# Supplementary material
Source: publisher figshare collection journal article supplement (https://acs.figshare.com/ndownloader/files/3901552)
Supplement: Supplementary file 1 [file 3901552]

# Supporting Information

## Ordered Monolayers of Free Standing Porphyrins on Gold

Franziska L. Otte,<sup>†</sup> Sonja Lemke,<sup>‡</sup> Christian Schütt,<sup>†</sup> Nicolai R. Krekieh,<sup>‡</sup> Ulrich Jung,<sup>‡</sup> Olaf M. Magnussen\*,<sup>‡</sup> Rainer Herges\*<sup>†</sup>.

<sup>†</sup>Otto-Diels-Institute for Organic Chemistry, Christian-Albrechts-University of Kiel, 24098 Kiel, Germany

<sup>‡</sup>Institute for Experimental and Applied Physics, Christian-Albrechts-University of Kiel, 24098 Kiel, Germany

## Table of Contents

### S1 Computational Details

### S2 Experimental Section

#### S2.1 STM details

#### S2.2 Synthetic procedures

## S1 Computational Details

### S1.1 Optimization of the Dimers of porphyrin-TATA 1 and 2

The optimizations of porphyrin-TATA **1** and **2** (Figure 3 in the main text) were performed at the PBE/SVP-D2 level of density functional theory using Turbomole 6.2<sup>1</sup>. The octyl side chains were replaced by methyl groups to save computational cost. The distance between the dimers was taken from the STM experiment. To include the geometry constraints of the surface, the platforms of each porphyrin-TATA (plane defined by the N atoms) were forced to lie within an imaginary plane. Thus electronic effects of the gold surface are not considered.

### S.1.2 Rotational barrier of porphyrin-TATA 1 and 2

To estimate the energy barrier for the rotation of the porphyrin substituent potential energy surface scans of compounds **1** and **2** were performed at the B3LYP<sup>2-4</sup>/6-31G\* level of theory using Gaussian 09 Rev. D01<sup>5</sup>. Propyl side chains were used to include the steric effects of the alkyl side chains at the TATA platform with respect to the rotation of the porphyrin. The orientation of the alkyl side chains of the TATA was elucidated in our previous work<sup>6</sup>. The energy surface scans for the rotation of 5-ethynyl(Zn)porphin (**1**) and the 5-ethynyl-5-10-15-triphenyl-(Zn)porphyrin (**2**) substituent around the C-C triple bond are shown in Figure S1. Six maxima were found at the positions where the one of the  $\beta$ -protons (the pyrrol protons of the porphyrin) is in close proximity to an alkyl side chain. The energy barrier for the rotation (0.3 kcal mol<sup>-1</sup>) is lower than  $kT$  (0.6 kcal mol<sup>-1</sup>) which leads us to the conclusion that the Zn-porphin **1** and Zn-porphyrin **2** can rotate freely at room temperature in isolated molecules (intermolecular interactions not included).

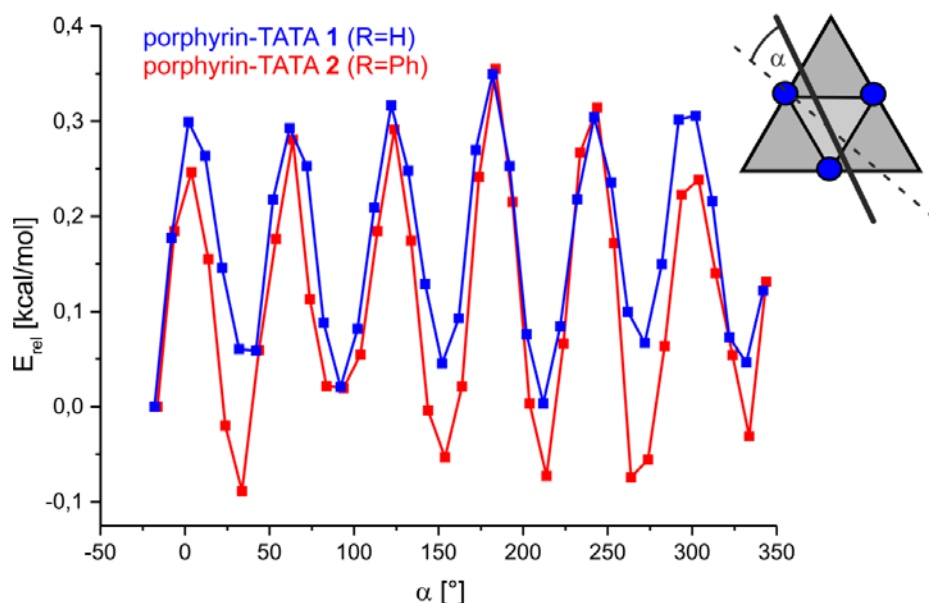

**Figure S1** Potential energy surface scan for the rotation of the 5-ethynyl-(Zn)porphin-TATA (**1**) (blue) and 5-ethynyl-5-10-15-triphenyl-(Zn)porphyrin-TATA (**2**) (red). The angle  $\alpha$  was increased in steps of 10° and all other geometry parameters were optimized at the B3LYP/6-31G\* level of theory. For clarity the TATA platform is represented as a triangle. The blue dots are the TATA nitrogen atoms. The porphyrin is represented as a black bar.

### S.1.3 Rotational barrier of the porphyrin-TATA 1 and 2 dimers

To estimate steric interactions between neighboring porphyrin TATA molecules potential energy surface scans of the dimers of porphyrin-TATA **1** and **2** were performed at the B3LYP/6-31G\*-D3<sup>7a</sup> level of theory using Gaussian 09 Rev. D01. Optimized structures were used as starting points for potential energy surface scans. Angle  $\beta$  was varied and single point energy calculations were performed. The alkyl side chains were replaced by methyl groups to save computational cost (Figure S2). As expected, the energy barrier for the rotation of **1** is still lower than  $kT$  (blue line). Therefore porphyrin **1** can rotate freely at room temperature. This is in agreement with an averaged the hexagonal symmetry of the SAM observed by STM. The rotation of porphyrin **2**, however, is sterically hindered due to the *meso* phenyl rings of the porphyrin (red curve). London dispersion interaction between the phenyl groups of neighboring porphyrin-TATA molecules gives rise to a minimum on the rotational hypersurface which is about 4 kcal mol<sup>-1</sup> lower in energy than two non-interacting molecules. As a result **2** forms the novel double-row structures on the Au(111) surface.

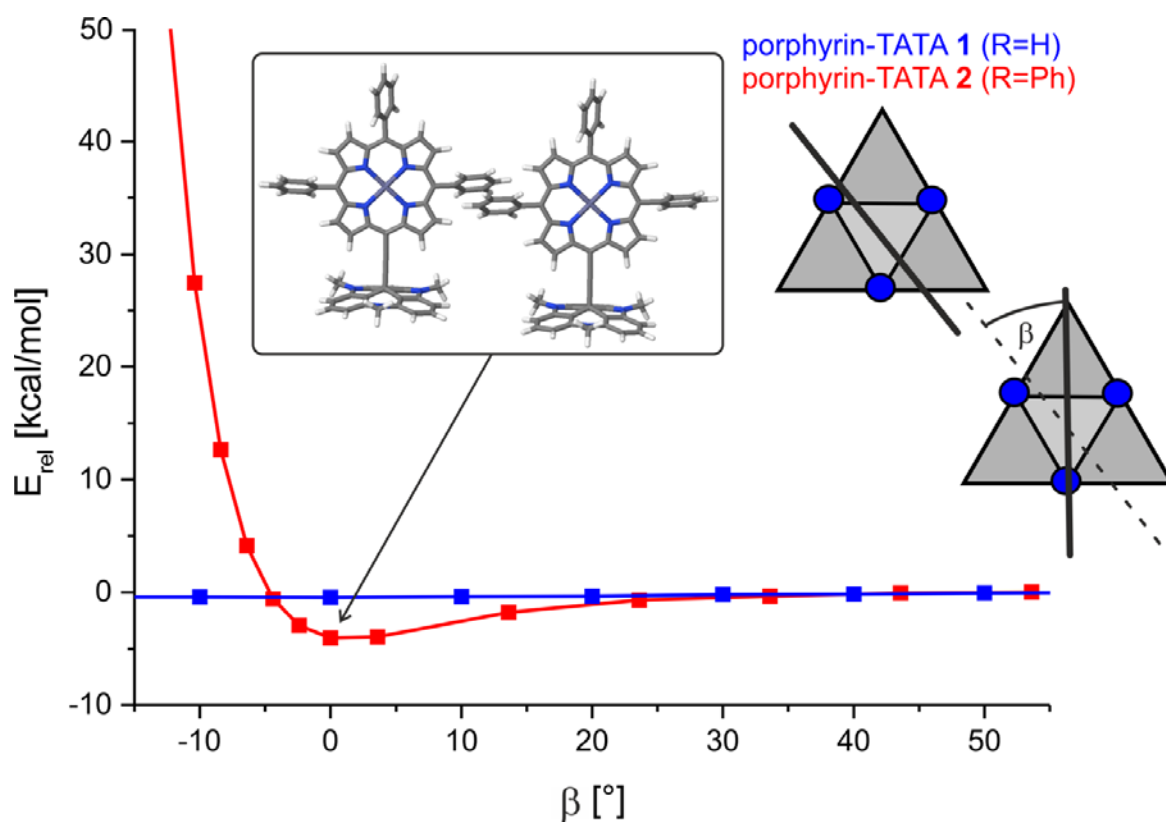

**Figure S2** Rigid potential energy surface scan for the rotation of the 5-ethynyl-(Zn)porphyrin-TATA (**1**) (blue), 5-ethynyl-5-10-15-triphenyl-(Zn)porphyrin-TATA (**2**) (red curve) as a function of angle  $\beta$  at the B3LYP/6-31G\*-D3 level of theory. The distances between the molecules are taken from STM. One of the porphyrin-TATA structures (the upper left one in the schematic representation) is frozen with respect to all geometry parameters. Angle  $\beta$  is varied in the other structure. For clarity the TATA platform is represented as a triangle. The blue dots are the platform nitrogen atoms. The porphyrin is represented as a black bar.

### S1.4 TDDFT calculations of porphyrin-TATA 2

The TDDFT calculation of porphyrin-TATA **2** was performed at the B3LYP/6-31G\* level of density functional theory. Note that the wavelengths of the transitions predicted by the TDDFT calculations are systematically 10-30 nm hypsochromic with respect to our experimental UV-VIS spectra which is a known problem at this level of theory.<sup>7b</sup> An excerpt of the corresponding log file is given in section S1.5.

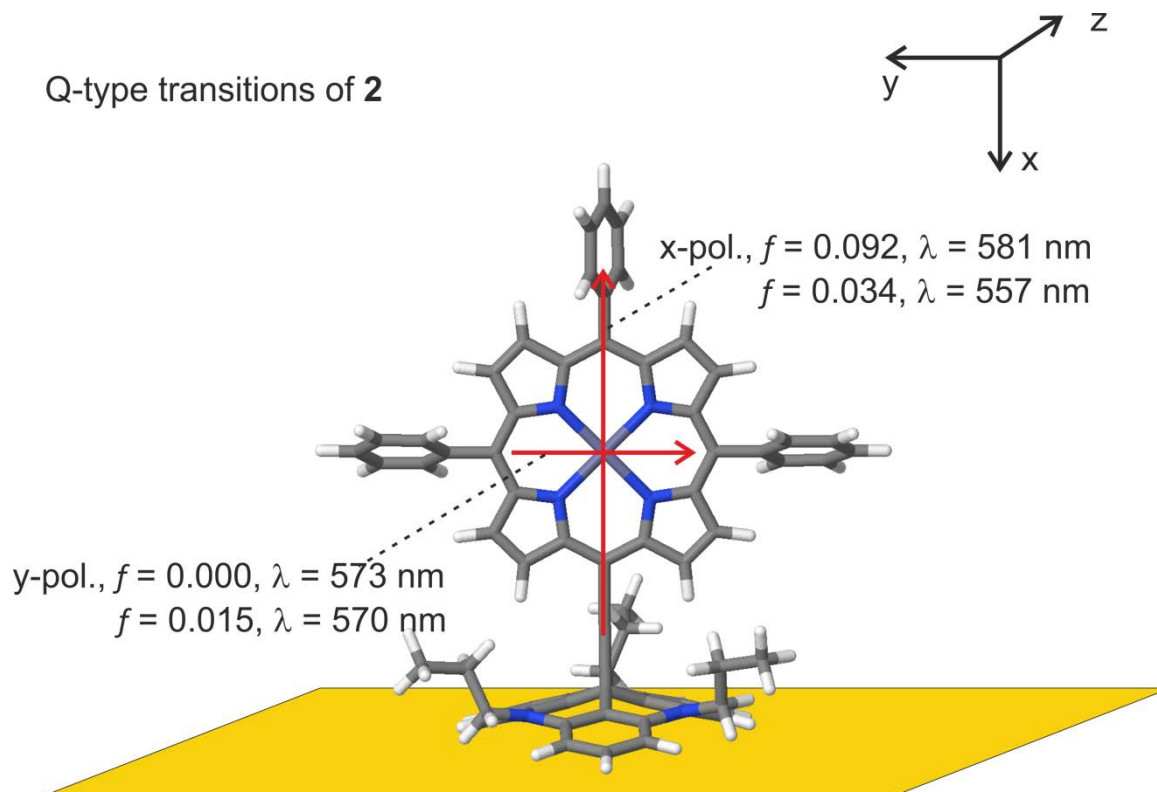

**Figure S3** Transition dipole vectors (red arrows), oscillator strengths ( $f$ ), and transition wavelengths ( $\lambda$ /nm) of the Q-type ( $\pi$ - $\pi^*$ ) transitions of porphyrin-TATA **2** calculated at the B3LYP/6-31G\* level of TDDFT. The four electronic transitions are polarized within the ring plane of the porphyrin (red arrows). Two transitions are x-polarized (perpendicular to the surface, assuming that the molecules stand upright) and two transitions are y-polarized (parallel to the surface). The two x-polarized transitions exhibit medium oscillator strengths ( $f$ ) and the two y-polarized transitions are very weak.

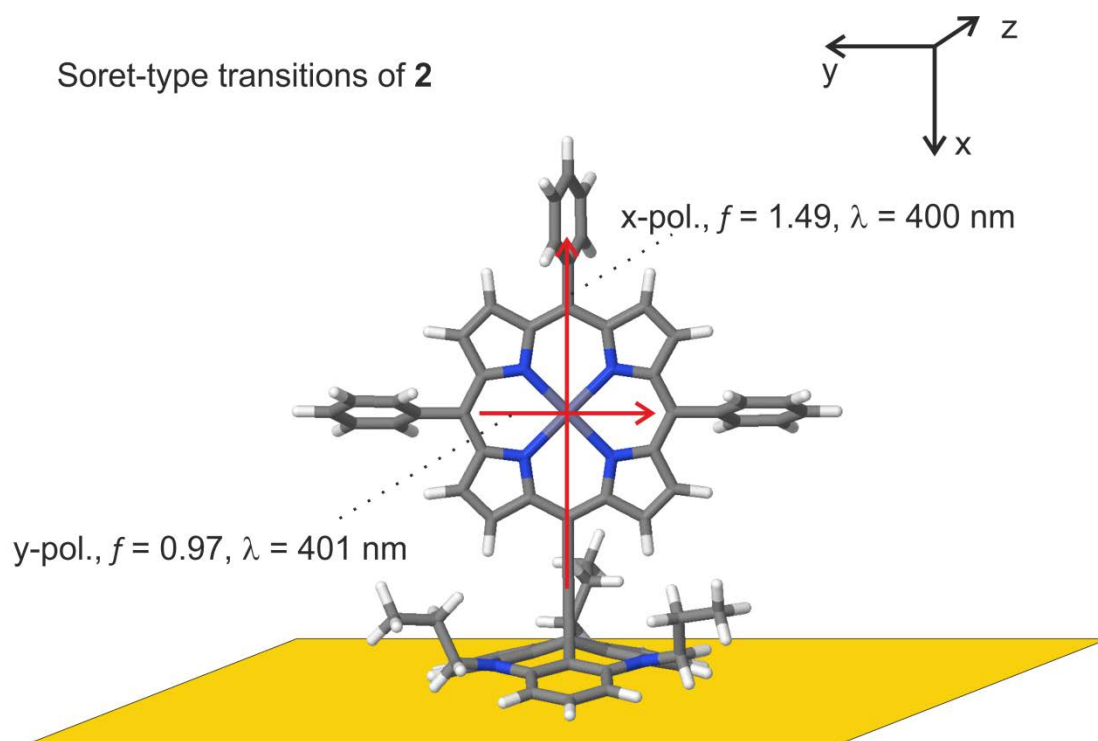

**Figure S4** Transition dipole vectors (red arrows), oscillator strengths ( $f$ ), and transition wavelengths ( $\lambda/\text{nm}$ ) of the Soret-type ( $\pi\text{-}\pi^*$ ) transitions of porphyrin-TATA **2** calculated at the B3LYP/6-31G\* level of TDDFT. The two electronic transitions are polarized within the ring plane of the porphyrin (red arrows) and exhibit extremely large oscillator strengths ( $f=1.49$  and  $0.97$ ). One transition is x-polarized (perpendicular to the surface, assuming that the molecules stand upright) and one transition is y-polarized (parallel to the surface).

**S1.5 Log file excerpt of the TD-DFT calculation of porphyrin-TATA 2****Coordinates:**

|    |          |          |          |
|----|----------|----------|----------|
| C  | -0.87499 | 0.47857  | -0.84493 |
| C  | 1.1419   | 0.0241   | 0.60554  |
| C  | -2.18966 | 0.13296  | -1.33965 |
| N  | -0.44923 | 1.65741  | -1.41232 |
| C  | -1.45951 | 2.07574  | -2.25889 |
| C  | -2.55786 | 1.12765  | -2.2128  |
| N  | 1.87735  | 1.13662  | 0.27031  |
| C  | 1.86334  | -0.78033 | 1.56843  |
| C  | 3.05044  | 1.06882  | 0.99829  |
| C  | 3.0468   | -0.12892 | 1.81887  |
| C  | -1.4485  | 3.25493  | -3.04419 |
| C  | -0.39886 | 4.20917  | -3.06665 |
| C  | -0.36467 | 5.36891  | -3.93834 |
| C  | 0.81418  | 6.02513  | -3.68334 |
| C  | 1.5042   | 5.26749  | -2.65618 |
| C  | 4.09285  | 2.02712  | 0.97972  |
| C  | 4.0938   | 3.21742  | 0.20824  |
| C  | 3.50528  | 4.82561  | -1.19831 |
| C  | 2.78053  | 5.60242  | -2.13734 |
| N  | 0.74976  | 4.16695  | -2.30335 |
| N  | 3.09141  | 3.63014  | -0.64589 |
| C  | 4.80734  | 5.18489  | -0.66851 |
| C  | 5.178    | 4.18142  | 0.19249  |
| H  | -2.75367 | -0.761   | -1.0479  |
| H  | -3.4973  | 1.21721  | -2.77104 |
| H  | 1.50109  | -1.72507 | 1.99191  |
| H  | 3.84579  | -0.42983 | 2.50658  |
| H  | -1.13415 | 5.63657  | -4.67188 |
| H  | 1.19453  | 6.93263  | -4.16683 |
| H  | 5.36874  | 6.09193  | -0.92178 |
| H  | 6.10844  | 4.10111  | 0.76663  |
| Zn | 1.31616  | 2.65081  | -1.02042 |
| C  | -0.14958 | -0.30587 | 0.09999  |
| C  | -0.75918 | -1.50437 | 0.57809  |
| C  | -1.26968 | -2.54977 | 0.98119  |
| C  | 1.44955  | -6.33174 | 2.54769  |
| C  | 0.9386   | -6.39309 | 1.24689  |
| C  | -0.19075 | -5.60986 | 0.9064   |
| C  | -0.76891 | -4.76932 | 1.88543  |
| C  | -0.23698 | -4.69972 | 3.19496  |
| C  | 0.87737  | -5.50954 | 3.52516  |
| C  | -1.88018 | -3.81077 | 1.47599  |

|   |          |          |          |
|---|----------|----------|----------|
| C | -2.71613 | -4.43671 | 0.36409  |
| C | -4.07165 | -4.05587 | 0.21505  |
| C | -2.09026 | -5.28541 | -0.58025 |
| C | -2.84278 | -5.75963 | -1.68249 |
| C | -4.17423 | -5.35991 | -1.83488 |
| C | -4.79904 | -4.51738 | -0.90937 |
| C | -2.77153 | -3.515   | 2.67857  |
| C | -2.19057 | -3.47477 | 3.96792  |
| C | -2.97806 | -3.07548 | 5.07407  |
| C | -4.32143 | -2.74346 | 4.8735   |
| C | -4.90885 | -2.79489 | 3.60515  |
| C | -4.13102 | -3.17037 | 2.48226  |
| N | -0.74305 | -5.64627 | -0.38672 |
| C | 0.09884  | -6.06106 | -1.50975 |
| C | 1.25757  | -5.08943 | -1.79182 |
| N | -4.67108 | -3.22719 | 1.18188  |
| N | -0.83939 | -3.83421 | 4.12826  |
| C | -0.10768 | -3.34979 | 5.29939  |
| C | 0.04951  | -1.819   | 5.33259  |
| C | 0.81313  | -1.34399 | 6.57146  |
| C | 2.10262  | -5.52866 | -2.99066 |
| C | -5.89511 | -2.50342 | 0.8364   |
| C | -5.67949 | -1.39709 | -0.21122 |
| C | -6.98049 | -0.67408 | -0.57067 |
| H | 2.31439  | -6.96092 | 2.81574  |
| H | 1.40531  | -7.06207 | 0.51167  |
| H | 1.2866   | -5.52581 | 4.54462  |
| H | -2.40786 | -6.45917 | -2.4093  |
| H | -4.75171 | -5.73437 | -2.6963  |
| H | -5.85169 | -4.24315 | -1.05636 |
| H | -2.55602 | -3.04369 | 6.08702  |
| H | -4.93977 | -2.45151 | 5.73829  |
| H | -5.97859 | -2.56687 | 3.50699  |
| H | 0.4848   | -7.09542 | -1.35159 |
| H | -0.53725 | -6.11113 | -2.41292 |
| H | 0.82774  | -4.07807 | -1.9703  |
| H | 1.89941  | -4.99763 | -0.88772 |
| H | -0.58366 | -3.71383 | 6.24081  |
| H | 0.90266  | -3.79882 | 5.27793  |
| H | 0.57955  | -1.49919 | 4.40716  |
| H | -0.95135 | -1.33598 | 5.29716  |
| H | 0.92872  | -0.23866 | 6.56941  |
| H | 0.28393  | -1.62338 | 7.51092  |
| H | 1.83397  | -1.78656 | 6.61937  |
| H | 2.9283   | -4.80993 | -3.18273 |

|   |          |          |          |
|---|----------|----------|----------|
| H | 2.56271  | -6.52934 | -2.82343 |
| H | 1.49307  | -5.5932  | -3.92074 |
| H | -6.68583 | -3.2135  | 0.49894  |
| H | -6.28863 | -2.03224 | 1.75492  |
| H | -4.93807 | -0.67269 | 0.19414  |
| H | -5.22276 | -1.83229 | -1.12762 |
| H | -6.79719 | 0.13185  | -1.31393 |
| H | -7.72879 | -1.37163 | -1.01103 |
| H | -7.4488  | -0.20331 | 0.32347  |
| C | 5.28787  | 1.76497  | 1.84532  |
| C | 6.17343  | 0.7037   | 1.55296  |
| C | 5.55651  | 2.57357  | 2.97217  |
| C | 7.29477  | 0.45972  | 2.36166  |
| H | 5.9796   | 0.06992  | 0.67235  |
| C | 6.67643  | 2.32856  | 3.78257  |
| H | 4.86887  | 3.40014  | 3.21472  |
| C | 7.5501   | 1.27115  | 3.47949  |
| H | 7.97758  | -0.36955 | 2.1129   |
| H | 6.86491  | 2.96822  | 4.66068  |
| H | 8.43026  | 1.07965  | 4.11515  |
| C | -2.63031 | 3.51597  | -3.9273  |
| C | -2.91603 | 2.67358  | -5.02525 |
| C | -3.48046 | 4.61976  | -3.68931 |
| C | -4.01477 | 2.92865  | -5.86121 |
| H | -2.25531 | 1.81504  | -5.22791 |
| C | -4.58123 | 4.87326  | -4.52278 |
| H | -3.27405 | 5.28107  | -2.83217 |
| C | -4.85146 | 4.02944  | -5.61288 |
| H | -4.21431 | 2.264    | -6.71804 |
| H | -5.23507 | 5.73694  | -4.31681 |
| H | -5.71367 | 4.23016  | -6.27    |
| C | 3.4153   | 6.86634  | -2.63202 |
| C | 4.57947  | 6.82896  | -3.43184 |
| C | 2.85987  | 8.1259   | -2.31365 |
| C | 5.17002  | 8.01381  | -3.89838 |
| H | 5.01712  | 5.85268  | -3.69714 |
| C | 3.45199  | 9.31114  | -2.77733 |
| H | 1.95495  | 8.16974  | -1.68592 |
| C | 4.60897  | 9.25941  | -3.57183 |
| H | 6.07457  | 7.96224  | -4.52697 |
| H | 3.00669  | 10.28434 | -2.51169 |
| H | 5.07351  | 10.19018 | -3.93729 |



**Electric dipole moments:**

Ground to excited state transition electric dipole moments (Au):

| state | X       | Y       | Z       | Dip. S. | Osc.   |
|-------|---------|---------|---------|---------|--------|
| 1     | -1.3286 | 0.0052  | -0.0569 | 1.7685  | 0.0924 |
| 2     | 0.0159  | 0.0634  | 0.0123  | 0.0044  | 0.0002 |
| 3     | 0.0088  | -0.5346 | 0.0095  | 0.2860  | 0.0152 |
| 4     | -0.7832 | -0.0027 | 0.0487  | 0.6158  | 0.0336 |
| 5     | 0.0501  | -0.0014 | 0.0006  | 0.0025  | 0.0001 |
| 6     | -0.0128 | 0.0122  | 0.0033  | 0.0003  | 0.0000 |
| 7     | -0.0517 | 0.0032  | -0.0541 | 0.0056  | 0.0004 |
| 8     | -0.0094 | -0.0143 | 0.0009  | 0.0003  | 0.0000 |
| 9     | 0.1398  | 3.5699  | 0.0342  | 12.7652 | 0.9668 |
| 10    | -4.4278 | 0.1437  | 0.0743  | 19.6318 | 1.4906 |

**Excitation energies and oscillator strengths:**

Excited State 1: Singlet-A 2.1327 eV 581.35 nm f=0.0924 <S\*\*2>=0.000  
 267 -> 272 -0.22691  
 270 -> 271 0.66752

This state for optimization and/or second-order correction.

Total Energy, E(TD-HF/TD-KS) = -4785.53070309

Copying the excited state density for this state as the 1-particle RhoCl density.

Excited State 2: Singlet-A 2.1655 eV 572.53 nm f=0.0002 <S\*\*2>=0.000  
 269 -> 271 0.70445

Excited State 3: Singlet-A 2.1752 eV 569.99 nm f=0.0152 <S\*\*2>=0.000  
 267 -> 271 0.41739  
 268 -> 272 0.32754  
 270 -> 272 0.46456

Excited State 4: Singlet-A 2.2260 eV 556.99 nm f=0.0336 <S\*\*2>=0.000  
 267 -> 272 -0.32006  
 268 -> 271 0.61829  
 270 -> 271 -0.10983

Excited State 5: Singlet-A 2.3392 eV 530.02 nm f=0.0001 <S\*\*2>=0.000  
 269 -> 272 0.70653

Excited State 6: Singlet-A 2.3496 eV 527.67 nm f=0.0000 <S\*\*2>=0.000  
 267 -> 271 0.14588  
 268 -> 272 0.49506

270 -> 272    -0.48249

Excited State 7:    Singlet-A    2.6702 eV 464.32 nm f=0.0004 <S\*\*2>=0.000  
 266 -> 271    0.70387

Excited State 8:    Singlet-A    2.8685 eV 432.22 nm f=0.0000 <S\*\*2>=0.000  
 266 -> 272    0.70688

Excited State 9:    Singlet-A    3.0915 eV 401.05 nm f=0.9668 <S\*\*2>=0.000  
 265 -> 272    0.11923  
 267 -> 271    0.53785  
 268 -> 272    -0.37287  
 270 -> 272    -0.21890

Excited State 10:    Singlet-A    3.0992 eV 400.05 nm f=1.4906 <S\*\*2>=0.000  
 265 -> 271    -0.16806  
 267 -> 272    0.55634  
 268 -> 271    0.33002  
 270 -> 271    0.19101

## S1.6 TDDFT calculations of porphyrin-TATA 1

The TDDFT calculation of porphyrin-TATA **2** was performed at the B3LYP/6-31G\* level of density functional theory. Note that the wavelengths of the transitions predicted by the TDDFT calculations are systematically 10-30 nm hypsochromic with respect to our experimental UV-VIS spectra which is a known problem at this level of theory.<sup>7b</sup> An excerpt of the corresponding log file is given in section S1.7.

### Q-type transitions of 1

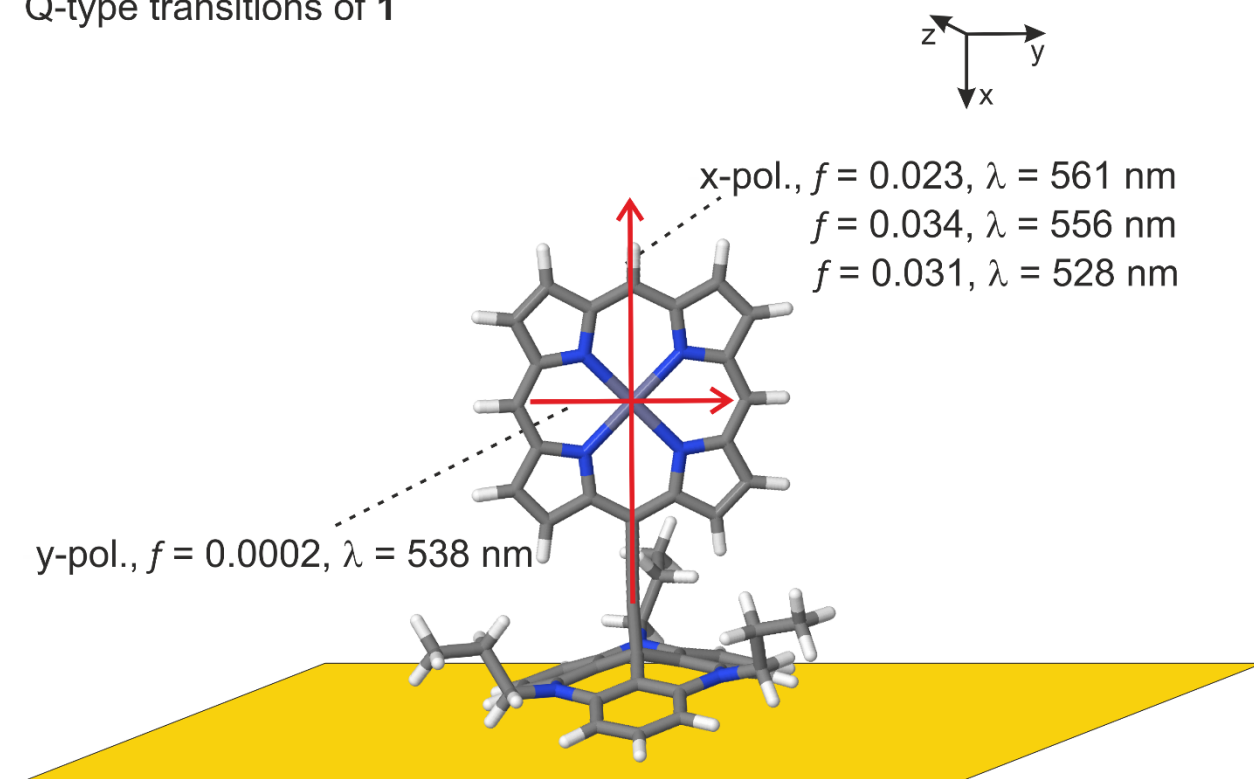

**Figure S5** Transition dipole vectors (red arrows), oscillator strengths ( $f$ ), and transition wavelengths ( $\lambda$ /nm) of the Q-type ( $\pi$ - $\pi^*$ ) transitions of porphyrin-TATA **1** calculated at the B3LYP/6-31G\* level of TDDFT. The four electronic transitions are polarized within the ring plane of the porphyrin (red arrows). Three transitions are x-polarized (perpendicular to the surface, assuming that the molecules stand upright) and one transition is y-polarized (parallel to the surface). The three x-polarized transitions exhibit medium oscillator strengths ( $f$ ) and the y-polarized transition is predicted to exhibit an extremely small extinction.

Soret-type transitions of **1**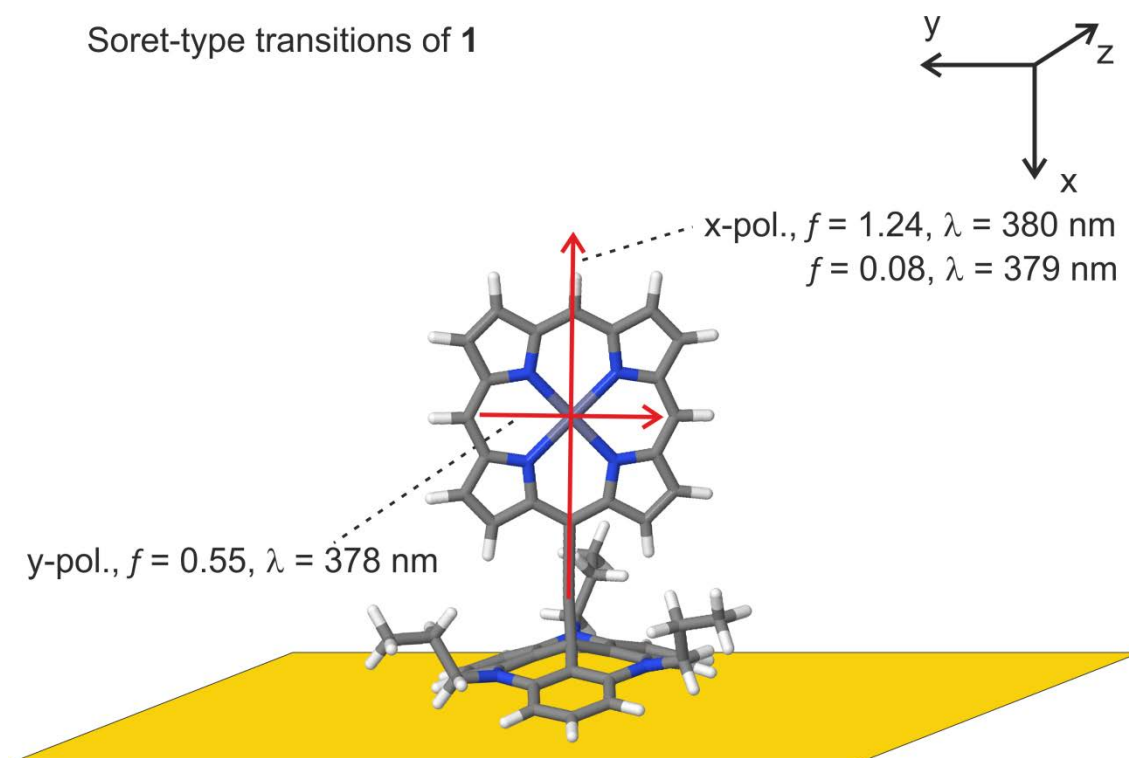

**Figure S6** Transition dipole vectors (red arrows), oscillator strengths ( $f$ ), and transition wavelengths ( $\lambda/\text{nm}$ ) of the Soret-type ( $\pi$ - $\pi^*$ ) transitions of porphyrin-TATA **1** calculated at the B3LYP/6-31G\* level of TDDFT. The three electronic transitions are polarized within the ring plane of the porphyrin (red arrows). Two transitions are x-polarized (perpendicular to the surface, assuming that the molecules stand upright) and one transition is y-polarized (parallel to the surface).

**S1.7 Log file excerpt of the TD-DFT calculation of porphyrin-TATA 1****Coordinates:**

|    |          |          |          |
|----|----------|----------|----------|
| C  | -0.01771 | 2.51527  | -1.39703 |
| C  | 2.12293  | 1.76372  | -0.3372  |
| C  | -1.4048  | 2.32469  | -1.74918 |
| N  | 0.43157  | 3.71398  | -1.88835 |
| C  | -0.63536 | 4.29088  | -2.54057 |
| C  | -1.78605 | 3.42458  | -2.45791 |
| N  | 2.88464  | 2.85314  | -0.67343 |
| C  | 2.92039  | 0.81051  | 0.39923  |
| C  | 4.1438   | 2.61855  | -0.1672  |
| C  | 4.17158  | 1.34174  | 0.50323  |
| C  | -0.61515 | 5.52689  | -3.18481 |
| C  | 0.47059  | 6.39622  | -3.29196 |
| C  | 0.45217  | 7.67314  | -3.96666 |
| C  | 1.70276  | 8.20267  | -3.84376 |
| C  | 2.48951  | 7.25047  | -3.09451 |
| C  | 5.23319  | 3.48096  | -0.27986 |
| C  | 5.2551   | 4.72221  | -0.91605 |
| C  | 4.61785  | 6.50518  | -2.03848 |
| C  | 3.83276  | 7.40937  | -2.75408 |
| N  | 1.71809  | 6.16096  | -2.76963 |
| N  | 4.18089  | 5.29884  | -1.5472  |
| C  | 6.01075  | 6.6948   | -1.70576 |
| C  | 6.40561  | 5.58996  | -1.0107  |
| H  | -1.98913 | 1.45425  | -1.48687 |
| H  | -2.75524 | 3.63822  | -2.89121 |
| H  | 2.55922  | -0.13811 | 0.77107  |
| H  | 5.04139  | 0.91324  | 0.98548  |
| H  | -1.54306 | 5.8457   | -3.6515  |
| H  | -0.40947 | 8.09901  | -4.46557 |
| H  | 2.0694   | 9.14876  | -4.22222 |
| H  | 6.16216  | 3.15061  | 0.17663  |
| H  | 4.31572  | 8.32612  | -3.08043 |
| H  | 6.59987  | 7.56283  | -1.97444 |
| H  | 7.38239  | 5.37294  | -0.59654 |
| Zn | 2.30357  | 4.51053  | -1.7165  |
| C  | 0.75576  | 1.59109  | -0.65793 |
| C  | 0.11952  | 0.39668  | -0.20513 |
| C  | -0.40255 | -0.62385 | 0.19928  |
| C  | 2.37112  | -4.4447  | 1.57891  |
| C  | 1.78525  | -4.49388 | 0.31862  |
| C  | 0.66298  | -3.69132 | 0.04862  |
| C  | 0.15994  | -2.84564 | 1.05103  |

|   |          |          |          |
|---|----------|----------|----------|
| C | 0.76618  | -2.79406 | 2.31795  |
| C | 1.87438  | -3.61939 | 2.5827   |
| C | -0.98099 | -1.88969 | 0.71895  |
| C | -1.88638 | -2.52823 | -0.32756 |
| C | -3.24925 | -2.18676 | -0.36776 |
| C | -1.3336  | -3.38785 | -1.29275 |
| C | -2.16105 | -3.91139 | -2.30232 |
| C | -3.50247 | -3.54849 | -2.34628 |
| C | -4.05932 | -2.69797 | -1.3973  |
| C | -1.78784 | -1.61389 | 1.9836   |
| C | -1.13023 | -1.58781 | 3.22534  |
| C | -1.84511 | -1.23449 | 4.38253  |
| C | -3.19978 | -0.93977 | 4.28183  |
| C | -3.86674 | -0.98446 | 3.06219  |
| C | -3.15661 | -1.30565 | 1.89108  |
| N | 0.03219  | -3.7155  | -1.2072  |
| C | 0.78466  | -4.14797 | -2.38784 |
| C | 1.97573  | -3.23321 | -2.71612 |
| N | -3.77638 | -1.34154 | 0.62624  |
| N | 0.23382  | -1.92435 | 3.28702  |
| C | 1.05146  | -1.43236 | 4.39884  |
| C | 1.17693  | 0.09947  | 4.42695  |
| C | 2.04038  | 0.57719  | 5.59875  |
| C | 2.71959  | -3.69901 | -3.97176 |
| C | -5.04255 | -0.64739 | 0.38251  |
| C | -4.96378 | 0.38747  | -0.75148 |
| C | -6.3161  | 1.06482  | -0.99614 |
| H | 3.2244   | -5.08312 | 1.7927   |
| H | 2.18486  | -5.16089 | -0.43522 |
| H | 2.32817  | -3.64736 | 3.56579  |
| H | -1.77887 | -4.61889 | -3.02777 |
| H | -4.1371  | -3.95978 | -3.12693 |
| H | -5.11346 | -2.45699 | -1.44867 |
| H | -1.36039 | -1.21283 | 5.35063  |
| H | -3.75786 | -0.69171 | 5.18088  |
| H | -4.93334 | -0.80033 | 3.03982  |
| H | 1.11652  | -5.19077 | -2.28025 |
| H | 0.10395  | -4.12953 | -3.23822 |
| H | 1.5976   | -2.21295 | -2.85391 |
| H | 2.66645  | -3.19671 | -1.86716 |
| H | 0.6698   | -1.80617 | 5.35982  |
| H | 2.05119  | -1.85023 | 4.28473  |
| H | 1.61305  | 0.42856  | 3.47567  |
| H | 0.18322  | 0.55602  | 4.48714  |
| H | 2.13162  | 1.6685   | 5.59828  |

|   |          |          |          |
|---|----------|----------|----------|
| H | 1.60809  | 0.28091  | 6.56283  |
| H | 3.05397  | 0.15995  | 5.54821  |
| H | 3.55922  | -3.03369 | -4.19914 |
| H | 3.12347  | -4.71155 | -3.84625 |
| H | 2.05997  | -3.712   | -4.84843 |
| H | -5.85102 | -1.36799 | 0.19201  |
| H | -5.31433 | -0.11775 | 1.29393  |
| H | -4.21056 | 1.13716  | -0.47907 |
| H | -4.61443 | -0.08937 | -1.67347 |
| H | -6.24317 | 1.81134  | -1.79421 |
| H | -7.08071 | 0.33615  | -1.29311 |
| H | -6.67811 | 1.57654  | -0.09573 |

### Electric dipole moments:

Ground to excited state transition electric dipole moments (Au):

| state | X       | Y       | Z       | Dip. S. | Osc.   |
|-------|---------|---------|---------|---------|--------|
| 1     | -0.6502 | 0.0534  | -0.0370 | 0.4270  | 0.0231 |
| 2     | 0.2429  | 0.0186  | 0.0453  | 0.0614  | 0.0034 |
| 3     | 0.0120  | 0.0601  | 0.0031  | 0.0038  | 0.0002 |
| 4     | -0.7283 | -0.0051 | 0.0360  | 0.5317  | 0.0306 |
| 5     | -0.0478 | 0.0765  | 0.0028  | 0.0082  | 0.0005 |
| 6     | -0.0062 | -0.1215 | -0.0009 | 0.0148  | 0.0009 |
| 7     | -0.0327 | 0.0062  | -0.0507 | 0.0037  | 0.0002 |
| 8     | 0.0161  | 0.0024  | -0.0025 | 0.0003  | 0.0000 |
| 9     | 3.9170  | 0.3666  | -0.0144 | 15.4779 | 1.2373 |
| 10    | 1.0237  | -0.0148 | -0.0057 | 1.0482  | 0.0839 |
| 11    | -0.6853 | 2.5282  | 0.0211  | 6.8618  | 0.5515 |

### Excitation energies and oscillator strengths:

Excited State 1: Singlet-A 2.2119 eV 560.53 nm f=0.0231 <S\*\*2>=0.000  
 207 ->212 0.10376  
 209 ->211 0.11186  
 210 ->211 0.68857

This state for optimization and/or second-order correction.

Total Energy, E(TD-HF/TD-KS) = -4092.39292027

Copying the excited state density for this state as the 1-particle RhoCI density.

Excited State 2: Singlet-A 2.2318 eV 555.52 nm f=0.0034 <S\*\*2>=0.000  
 209 ->211 0.69567  
 210 ->211 -0.10670

Excited State 3: Singlet-A 2.3043 eV 538.05 nm f=0.0002 <S\*\*2>=0.000  
 207 ->211 0.44119  
 208 ->212 -0.40597  
 210 ->212 -0.36780

|                   |           |           |           |          |              |
|-------------------|-----------|-----------|-----------|----------|--------------|
| Excited State 4:  | Singlet-A | 2.3462 eV | 528.44 nm | f=0.0306 | <S**2>=0.000 |
| 207 ->212         | 0.41195   |           |           |          |              |
| 208 ->211         | 0.56655   |           |           |          |              |
|                   |           |           |           |          |              |
| Excited State 5:  | Singlet-A | 2.4112 eV | 514.19 nm | f=0.0005 | <S**2>=0.000 |
| 207 ->211         | 0.10589   |           |           |          |              |
| 208 ->212         | -0.17734  |           |           |          |              |
| 209 ->212         | 0.54339   |           |           |          |              |
| 210 ->212         | 0.40154   |           |           |          |              |
|                   |           |           |           |          |              |
| Excited State 6:  | Singlet-A | 2.4243 eV | 511.43 nm | f=0.0009 | <S**2>=0.000 |
| 207 ->211         | -0.15853  |           |           |          |              |
| 208 ->212         | 0.28228   |           |           |          |              |
| 209 ->212         | 0.44818   |           |           |          |              |
| 210 ->212         | -0.43980  |           |           |          |              |
|                   |           |           |           |          |              |
| Excited State 7:  | Singlet-A | 2.7343 eV | 453.44 nm | f=0.0002 | <S**2>=0.000 |
| 206 ->211         | 0.70421   |           |           |          |              |
|                   |           |           |           |          |              |
| Excited State 8:  | Singlet-A | 2.9428 eV | 421.32 nm | f=0.0000 | <S**2>=0.000 |
| 206 ->212         | 0.70688   |           |           |          |              |
|                   |           |           |           |          |              |
| Excited State 9:  | Singlet-A | 3.2630 eV | 379.96 nm | f=1.2373 | <S**2>=0.000 |
| 204 ->211         | -0.17003  |           |           |          |              |
| 205 ->211         | 0.24418   |           |           |          |              |
| 207 ->212         | 0.49097   |           |           |          |              |
| 208 ->211         | -0.37883  |           |           |          |              |
|                   |           |           |           |          |              |
| Excited State 10: | Singlet-A | 3.2681 eV | 379.38 nm | f=0.0839 | <S**2>=0.000 |
| 204 ->211         | 0.68277   |           |           |          |              |
| 207 ->212         | 0.12666   |           |           |          |              |
|                   |           |           |           |          |              |
| Excited State 11: | Singlet-A | 3.2806 eV | 377.93 nm | f=0.5515 | <S**2>=0.000 |
| 205 ->212         | -0.20236  |           |           |          |              |
| 207 ->211         | 0.48438   |           |           |          |              |
| 208 ->212         | 0.44013   |           |           |          |              |



## S2 Experimental Section

### S2.1 STM details

STM images were obtained under ambient conditions using a PicoPlus STM (Agilent) and mechanically cut PtIr tips. Typically, a tunneling current  $I_t$  in the range 7 to 15 pA and a tunneling bias of 0.3 to 0.8 V was used. The displayed images were mildly filtered to reduce noise.

High resolution images of the porphyrin-TATA adlayer (Figure S7) reveal a triangular shape of the molecules, in which three equidistant maxima in each molecule are clearly resolved. Similar images have been obtained previously for TATA derivatives with other vertical groups (phenyl, azobenzene) and can be attributed to the three benzene rings of the TATA platform. Because of the small barrier for in-plane rotation of the vertical group and the sufficiently large TATA-TATA spacing, the orientation of these groups will change rapidly on the time-scale of the STM imaging at room temperature. For this reason, these groups only provide an overall uniform contribution and the contrast in the submolecular resolution is dominated by the static TATA unit. Such observation of atomic or molecular features underneath highly mobile species is a well-known effect in high resolution STM. The small variations in contrast between different molecules and between the three maxima within each molecule, respectively, may originate from local hindering of the rotation by the alkyl side chains as well as direct contributions of the side chains to the image. Furthermore, for these open adlayers physisorption of airborne contaminations from the surrounding environment in between the vertical groups cannot be rigorously excluded for images obtained under ambient conditions.

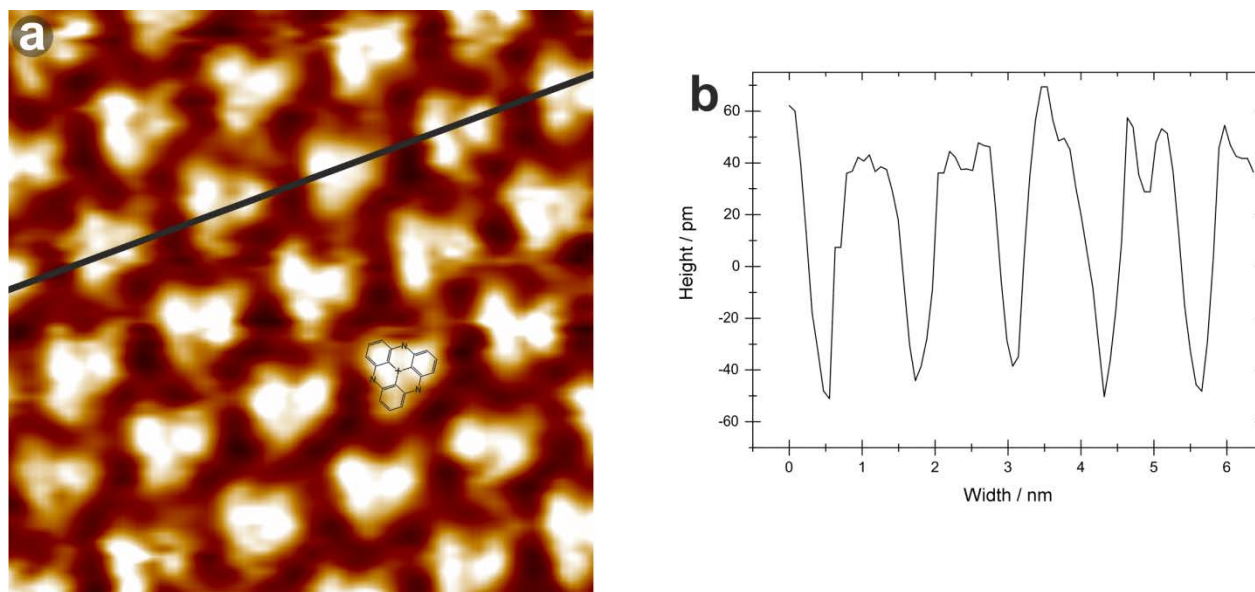

**Figure S7** (a) High-resolution STM image of porphyrin-TATA adlayers of 1 ( $6 \times 6 \text{ nm}^2$ ,  $I_t = 9 \text{ pA}$ ,  $U_{\text{Bias}} = 0.5 \text{ V}$ ) and (b) cross section along the line shown in the image. To indicate the orientation of the TATA platform a to-scale model is overlaid on one of the molecules visible in (a). (b) Cross section along the black line shown in the image in (a).

To better illustrate the double row structure of the adlayer, the average apparent height in the STM images along the direction normal to the double rows is shown in Figure S8. The characteristic structure consisting of double rows with a weak minimum in between ( $\approx 20$  pm modulation), separated by deeper minima ( $\approx 80$  pm modulation) is clearly visible.

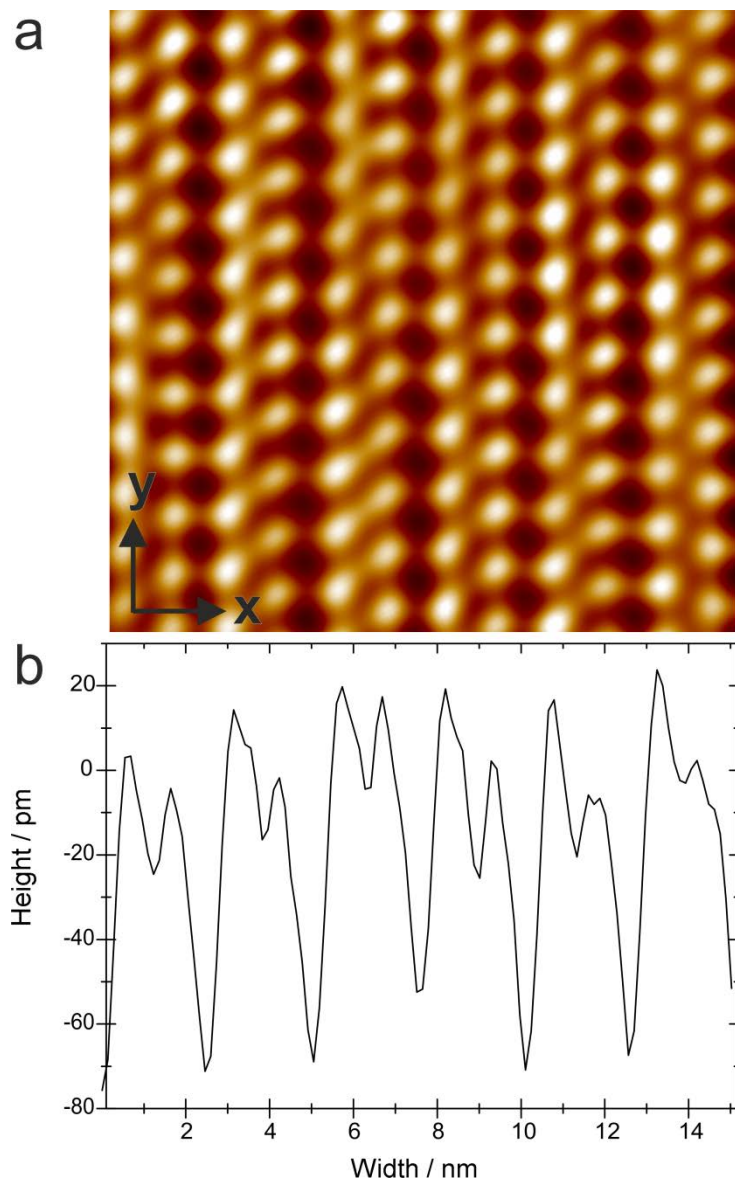

**Figure S8** (a) High-resolution STM image of porphyrin-TATA adlayers of **2** ( $14.8 \times 15.0$  nm<sup>2</sup>,  $I_t = 13$  pA,  $U_{\text{Bias}} = 0.48$  V) and (b) average height distribution normal to the molecular rows, obtained by averaging over the entire y range of the image in (a). The unfiltered original STM data was used to obtain the data in (b).

## S2.2 Synthetic procedures

### 5-Trimethylsilylethynylporphin

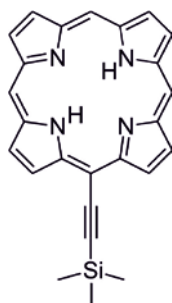

2,2'-Dipyrrromethane (500 mg, 3.42 mmol) was dissolved under nitrogen in dry chloroform (225 mL) and formalin (37 wt % in water) (339  $\mu$ L, 3.42 mmol) and 3-trimethylsilyl-2-propynale (251  $\mu$ L, 1.71 mmol) was added. Then,  $\text{BF}_3 \cdot \text{O}(\text{Et})_2$  (94.0  $\mu$ L, 762 mmol) was injected, and the solution was stirred at RT for 1 h. After that, *p*-chloranil (450 mg, 183 mmol) was added under air, and the mixture was allowed to stir for another 1 h. The solvent was removed in vacuo, and the solid was purified by chromatography on silica gel (0.043-0.060), first using dichlormethane, and then twice with dichloromethane:*n*-hexane 5:2 as eluent ( $R_f$  = 0.76). The product was obtained as a purple solid (50.0 mg, 123  $\mu$ mol, 7 %).

$^1\text{H-NMR}$  (500 MHz,  $\text{CDCl}_3$ ):  $\delta$  = 10.2 (s, 2H), 10.1 (s, 1H), 9.81 (d,  $^3J$  = 4.5 Hz, 2H), 9.33 (d,  $^3J$  = 4.5 Hz, 2H), 9.31 (s, 4H), 0.67 (s, 9H), -2.81 (br s, 2H).  $^{13}\text{C-NMR}$  (125.8 MHz,  $\text{CDCl}_3$ ):  $\delta$  = 148.9, 140.7, 131.4, 131.3, 130.6, 106.6, 105.5, 105.3, 101.9, 98.5, 0.43.

**MS** (EI, 70 eV):  $m/z$  (%) = 406 (100)  $[\text{M}]^+$ , **MS** (CI, Isobutan):  $m/z$  (%) = 407 (100)  $[\text{M}+\text{H}]^+$ .

Anal. calcd. for  $\text{C}_{25}\text{H}_{22}\text{N}_4\text{Si}$  (406.16) C 73.86, H 5.45, N 13.78, Found: C 73.96, H 5.74, N 13.60; UV-Vis ( $\text{CH}_2\text{Cl}_2$ )  $\lambda_{\text{max}}$  (lg  $\epsilon$ ): 413 (5.13), 507 (3.75), 542 (3.74), 581 (3.33), 637 (3.26) nm; m.p. >400° C.

### (5-Trimethylsilylethynylporphyrinato)-zinc(II)

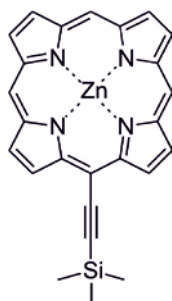

5-Trimethylsilylethynylporphyrine (50.0 mg, 123  $\mu$ mol) was dissolved in chloroform (30 mL), then zinc acetate dihydrate (200 mg, 911  $\mu$ mol) dissolved in methanol (10 ml) was added and the mixture was stirred at RT for 20 h. The mixture was washed with water, the layers were separated, and the organic layer was dried with  $\text{Na}_2\text{SO}_4$ .

The solvent was removed in vacuo, and the residue purified by chromatography on silica gel (0.043-0.060) using dichloromethane as eluent. The product was obtained as a purple solid (57.0 mg, 123  $\mu\text{mol}$ , >98%).

**$^1\text{H-NMR}$**  (500 MHz,  $\text{CDCl}_3$ ):  $\delta$  = 10.16 (s, 2H), 10.1 (s, 1H), 9.86 (d,  $^3J$  = 4.3 Hz, 2H), 9.42-9.39 (m, 6H), 0.69 (s, 9H).  **$^{13}\text{C-NMR}$**  (125.8 MHz,  $\text{CDCl}_3$ ):  $\delta$  = 139.2, 132.9, 132.1, 107.6, 0.40. **MS** (EI):  $m/z$  (%) = 468 (100)  $[\text{M}]^+$ , **MS** (CI):  $m/z$  (%) = 469 (100)  $[\text{M}+\text{H}]^+$ .

Anal. calcd. For  $\text{C}_{25}\text{H}_{20}\text{N}_4\text{SiZn}$  (468.07) C 63.90, H 4.29, N 11.92, found C 63.67, H 4.95, N 11.83; UV-Vis ( $\text{CH}_2\text{Cl}_2$ )  $\lambda_{\text{max}}$  (lg  $\epsilon$ ): 413 (5.36), 545 (4.06), 583 (3.84) nm; m.p. >400° C.

**5-Trimethylsilylethynyl-10,15,20-triphenylporphyrine** and **(5-Trimethylsilylethynyl-10,20-diphenyl porphyrinato) Zn(II)** were prepared according to a procedure by Fathalla et al.<sup>8</sup> For alternative methods see ref 9-11.

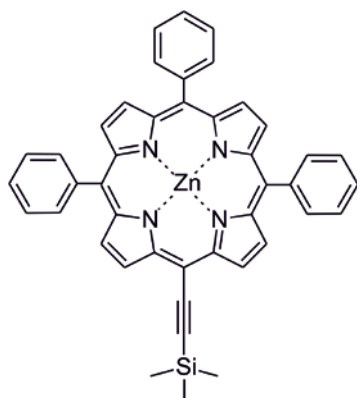

**(5-Trimethylsilylethynyl-10,15,20-triphenylporphyrinato)-manganese(III) chloride**

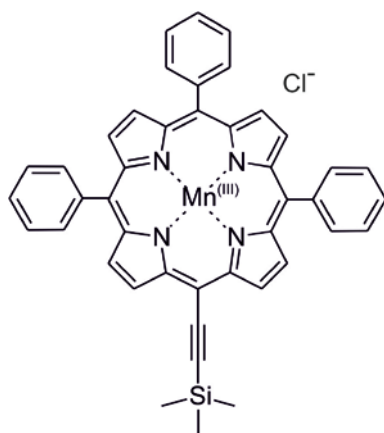

5-Trimethylsilylethynyl-10,15,20-triphenylporphyrin (20.0 mg, 31.5  $\mu\text{mol}$ ) was dissolved in dry dimethylformamide (200 ml) and refluxed under nitrogen. Manganese chloride tetrahydrate (200 mg, 1.11 mmol) was added and refluxed for a further period of 2 h.

Water (400 ml) was added, and the solution was stirred for a further period of 12 h. Dichloromethane was added to the reaction mixture, the phases were separated, and the organic layer was dried with  $\text{Na}_2\text{SO}_4$  and filtered. The solvent was removed in vacuo. The product was purified on a short column of basic aluminum oxide using chloroform and methanol as eluent. The product was obtained as a green solid (9.00 mg 12.5  $\mu\text{mol}$ , 40 %).

**MS** (ESI):  $m/z$  (%) = 687.1 (100)  $[\text{M}-\text{Cl}]^+$ ; Anal. calcd. for  $\text{C}_{43}\text{H}_{32}\text{N}_4\text{SiMnCl}$  (722.15) C 71.41, H 4.46, N 7.75, found C 71.67, H 3.95, N 7.83; UV-Vis ( $\text{CH}_2\text{Cl}_2$ )  $\lambda_{\text{max}}$  (lg  $\epsilon$ ): 380 (4.17), 408 (4.12), 483 (4.95), 591 (3.67), 636 (3.62) nm; m.p. >400° C.

### General method to prepare porphyrine functionalized TATA platforms:<sup>12-15</sup>

Powdered KOH (in excess) was added to a solution of trimethylsilylethynyl substituted porphyrins in 40 mL THF under nitrogen. The mixture was sonicated for 40 min at RT using a Branson Sonifier W-450. After adding 4,8,12-tri-*n*-octyl-4,8,12-triazatriangulenium tetrafluoroborate (1 equiv.), the mixture was sonicated for a period of 4–6.5 h at 10–15 °C. The mixture was poured into 100 mL of a concentrated NaCl solution. The layers were separated and the aqueous layer was extracted with diethyl ether. The combined organic layers were dried with  $\text{NaSO}_4$  and filtered. After evaporating the solvents, the residue was first dissolved in diethylether, and filtered through a short column of basic aluminum oxide and the solvent was evaporated. The residue was dissolved in ethylacetate:*n*-hexane (1:1), and filtered through a short column of basic aluminum oxide. The solvent was evaporated, and the product was obtained in pure form.

### {5-[(4,8,12-Tri-*n*-octyl-4,8,12-triazatriangulene-12c-yl)-ethynyl]-porphyrinato}-zinc(II) 1

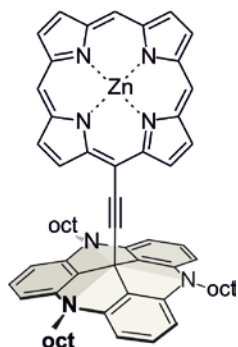

Following the general method (above), KOH (500 mg, 8.91 mmol) was added to a solution of (5-trimethylsilylethynylporphyrinato)-zinc(II) (60.0 mg, 127  $\mu\text{mol}$ ) in 40 mL THF. After 30 min of sonication, 4,8,12-tri-*n*-octyl-4,8,12-triazatriangulenium tetrafluoroborate (89.5 mg, 127  $\mu\text{mol}$ ) was added, and the mixture was sonicated for 4 h. The red product was obtained in a yield of 42 % (55.0 mg, 54.0  $\mu\text{mol}$ ).

**$^1\text{H-NMR}$**  (600 MHz,  $\text{CDCl}_3$ ):  $\delta$  = 9.87 (s, 1H), 9.40 (s, 2H), 9.20 (d,  $^3J$  = 4.1 Hz, 2H), 9.09 (d,  $^3J$  = 4.1 Hz, 2H), 8.70 (d,  $^3J$  = 4.1 Hz, 2H), 8.60 (d,  $^3J$  = 4.1 Hz, 2H), 7.46 (t,  $^3J$  = 8.3 Hz, 3H), 6.87 (d,  $^3J$  = 8.3 Hz, 6H), 4.27 (t,  $^3J$  = 8.3 Hz, 6H), 2.12–2.06 (m, 6H), 1.62–1.56 (m, 6H), 1.41–1.36 (m, 6H), 1.23–1.18 (m, 6H), 1.14–1.07 (m, 12H), 0.71 (t,  $^3J$  = 6.9 Hz, 9H);

**<sup>13</sup>C-NMR** (150 MHz, CDCl<sub>3</sub>):  $\delta$  = 150.3, 148.3, 147.6, 147.1, 140.9, 131.7, 131.5, 130.7, 130.4, 128.7, 110.0, 106.0, 105.2, 105.1, 100.1, 98.7, 85.6, 46.9, 31.7, 29.7, 29.4, 29.3, 27.2, 26.0, 22.6, 13.9; **MS** (ESI, 649-2000):  $m/z$  (%) = 1014.5 (100) [M+H]<sup>+</sup>, 1013.6 (13) [M]<sup>+</sup>; **MS** (ESI):  $m/z$  (%) = 1014.5 (4) [M+H]<sup>+</sup>, 618.3 (100) [M-C<sub>22</sub>H<sub>12</sub>N<sub>4</sub>Zn]<sup>+</sup>;

Anal. calcd. for C<sub>65</sub>H<sub>71</sub>N<sub>7</sub>Zn (1015.69) C 76.86, H 7.05, N 9.65, found C 75.98, H 6.88, N 9.23; UV-Vis (C<sub>7</sub>H<sub>8</sub>):  $\lambda_{\max}$  (lg  $\epsilon$ ) = 326 (4.44), 422 (5.35), 551 (4.27), 586 (4.04) nm; m.p. >400° C.

**{5-[(4,8,12-Tri-*n*-octyl-4,8,12-triazatriangulene-12c-yl)-ethynyl]-10,15,20-triphenyl-porphyrinato}-zinc(II) 2**

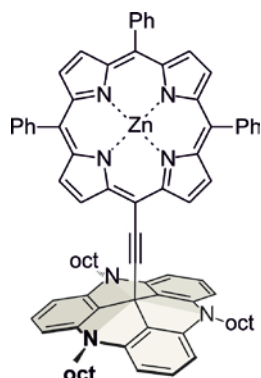

Following the general method described above, KOH (556 mg, 9.91 mmol) was added to a solution of (5-trimethylsilylethynyl-10,15,20-triphenylporphyrinato)-zinc(II) (74.2 mg, 106  $\mu$ mol) in 40 mL THF. After 30 min of sonication, 4,8,12-tri-*n*-octyl-4,8,12-triazatriangulene tetrafluoroborate (75.0 mg, 100  $\mu$ mol) was added and the mixture was sonicated for 6.5 h. The blue greenish product was obtained in a yield of 72 % (95.4 mg (76.7  $\mu$ mol)).

**<sup>1</sup>H-NMR** (500 MHz, CDCl<sub>3</sub>):  $\delta$  = 9.15 (d, <sup>3</sup>J = 4.6 Hz, 2H), 8.80 (d, <sup>3</sup>J = 4.6 Hz, 2H), 8.76 (d, <sup>3</sup>J = 4.6 Hz, 2H), 8.15-8.11 (m, 6H, H-2-Ph, H-6-Ph), 7.77-7.68 (m, 9H), 7.30 (t, <sup>3</sup>J = 8.3 Hz, 3H), 6.70 (d, <sup>3</sup>J = 8.3 Hz, 6H), 4.07 (t, <sup>3</sup>J = 8.3 Hz, 6H), 1.99-1.92 (m, 6H), 1.49-1.45 (m, 6H), 1.30-1.26 (m, 6H), 1.15-1.12 (m, 6H), 1.06-1.01 (m, 12H), 0.68 (t, <sup>3</sup>J = 6.9 Hz, 9H) ppm.

**<sup>13</sup>C-NMR** (125 MHz, CDCl<sub>3</sub>):  $\delta$  = 150.2, 149.8, 140.7, 134.3, 132.2, 131.9, 131.6, 131.4, 128.5, 127.4, 126.5, 122.0, 121.4, 110.2, 105.0, 100.5, 90.1, 80.1, 46.7, 31.7, 29.7, 29.3, 29.2, 27.1, 26.0, 22.6, 14.2; **MS** (ESI, 651-2000):  $m/z$  (%) = 1244.6 (95) [M+H], 1243.6 (100) [M]<sup>+</sup>; **MS** (ESI):  $m/z$  (%) = 1243.6 (4) [M]<sup>+</sup>, 618.3 (100) [M-C<sub>39</sub>H<sub>26</sub>N<sub>4</sub>Zn]<sup>+</sup>;

Anal. calcd. for C<sub>83</sub>H<sub>83</sub>N<sub>7</sub>Zn (1243.97) C 80.14, H 6.72, N 7.88, found C 79.06, H 6.77, N 7.23; UV-Vis (CH<sub>3</sub>CN):  $\lambda_{\max}$  (lg  $\epsilon$ ) = 273 (4.59), 293 (4.54), 326 (4.31), 433 (5.30), 570 (4.00), 616 (4.12) nm; m.p. >400°C.

**{5-[(4,8,12-Tri-*n*-octyl-4,8,12-triazatriangulene-12c-yl)-ethynyl]-10,20-diphenyl-porphyrinato}-zinc(II)**

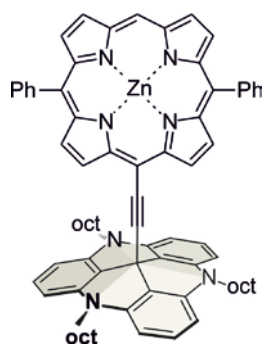

Following the general method described above, KOH (350 mg, 6.24 mmol) was added to a solution of (diphenyl-10-dimethylsilylethynylporphyrinato)-zinc(II) (43.9 mg, 70.6  $\mu\text{mol}$ ) in 40 mL THF. After 30 min of sonication, 4,8,12-tri-*n*-octyl-4,8,12-triazatriangulonium tetrafluoroborate (52.0 mg, 73.7  $\mu\text{mol}$ ) was added and the mixture was sonicated for 5 h. The product was obtained as a red solid in a yield of 11 % (9.00 mg, 7.72  $\mu\text{mol}$ ).

$^1\text{H-NMR}$  (500 MHz,  $\text{CDCl}_3$ ):  $\delta$  = 10.1 (s, 1H), 9.23 (d,  $^3J$  = 4.6 Hz, 2H), 9.17 (d,  $^3J$  = 4.6 Hz, 2H), 8.91 (d,  $^3J$  = 4.6 Hz, 2H), 8.77 (d,  $^3J$  = 4.6 Hz, 2H), 8.13-8.09 (m, 4H), 7.78-7.72 (m, 6H), 7.30 (t,  $^3J$  = 8.3 Hz, 3H), 6.69 (d,  $^3J$  = 8.3 Hz, 6H), 4.07 (t,  $^3J$  = 8.3 Hz, 6H), 1.98-1.93 (m, 6H), 1.48-1.45 (m, 6H), 1.29-1.25 (m, 6H), 1.15-1.12 (m, 6H), 1.07-1.01 (m, 12H), 0.67 (t,  $^3J$  = 6.9 Hz, 9H) ppm.  $^{13}\text{C-NMR}$  (125 MHz,  $\text{CDCl}_3$ ):  $\delta$  = 151.6, 150.0, 149.4, 149.3, 142.5, 140.7, 134.3, 132.1, 131.9, 131.5, 131.2, 128.5, 127.3, 126.5, 122.6, 110.1, 106.8, 105.0, 100.6, 98.1, 80.1, 46.8, 31.7, 29.8, 29.4, 29.3, 27.1, 26.0, 22.7, 14.0; **MS** (ESI: 699-1500):  $m/z$  (%) = 1167.6 (98)  $[\text{M}+\text{H}]^+$ , 1166.6 (100)  $[\text{M}]^+$ ; **MS** (ESI):  $m/z$  (%) = 1167.6 (3)  $[\text{M}+2]^+$ , 1166.6 (4)  $[\text{M}]^+$ , 618.3 (100)  $[\text{M}-\text{C}_{34}\text{H}_{20}\text{N}_4\text{Zn}]^+$ .

Anal. calcd. for  $\text{C}_{77}\text{H}_{79}\text{N}_7\text{Zn}$  (1167.88) C 79.19, H 6.82, N 8.40, found C 79.69, H 6.84, N 8.70 %; UV-Vis ( $\text{CH}_3\text{CN}$ ):  $\lambda_{\text{max}}$  (lg  $\epsilon$ ) = 273 (4.12), 292 (4.03), 324 (3.87), 428 (4.87), 564 (3.63), 608 (3.54) nm; m.p. >400°C.

**{5-[(4,8,12-Tri-*n*-octyl-4,8,12-triazatriangulene-12c-yl)-ethynyl]-10,15,20-triphenyl-porphyrinato}-manganese(III) chloride**

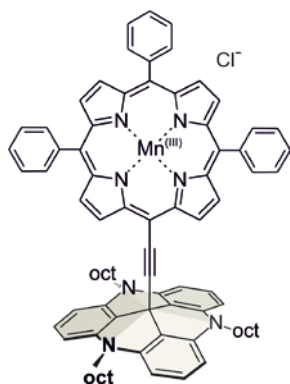



Following the general method described above, KOH (50 mg, 89.1  $\mu\text{mol}$ ) was added to a solution of (5-trimethylsilylethynyl-10,15,20-triphenylporphyrinato)-manganese(III)chloride (9.00 mg, 12.5  $\mu\text{mol}$ ) in 40 mL THF. After 30 min of sonication, 4,8,12-Tri-*n*-octyl-4,8,12-triazatrianguleniumtetrafluoro-borate (15.0 mg, 21.2  $\mu\text{mol}$ ) was added and the mixture was sonicated for 5 h. The red product was obtained in a yield of 40 % (6.50 mg, 5.13  $\mu\text{mol}$ ), mp.: > 400 °C.

**MS** (ESI, 1220-1250):  $m/z$  (%) = 1233.6 (92)  $[\text{M-Cl+H}]^+$ , 1232.6 (100)  $[\text{M-Cl}]^+$ ; **MS** (ESI):  $m/z$  (%) = 1233.6 (12)  $[\text{M-Cl+H}]^+$ , 1232.6 (13)  $[\text{M-Cl}]^+$ , 618.5 (100)  $[\text{M-C}_{39}\text{H}_{26}\text{N}_4\text{MnCl}]^+$ ; Anal. calcd. for  $\text{C}_{83}\text{H}_{83}\text{N}_7\text{MnCl}$  (1267.55) C 78.56, H 6.59, N 7.73, found C 79.96, H 6.37, N 8.43 %; UV-Vis ( $\text{CH}_3\text{COOC}_2\text{H}_5$ ):  $\lambda_{\text{max}}$  (lg  $\epsilon$ ) = 335 (4.28), 377 (4.40), 406 (4.35), 480 (4.68), 598 (3.67), 640 (3.88) nm.

## References:

- (1) TURBOMOLE V6.2 2010, a development of University of Karlsruhe and Forschungszentrum Karlsruhe GmbH, TURBOMOLE GmbH, since 2007; available from <http://www.turbomole.com>, 1989-2007.
- (2) A. D. Becke, *J. Chem. Phys.* **1993**, *98*, 5648-5652.
- (3) C. Lee, W. Yang, R.G. Parr, *Phys. Rev. B* **1988**, *37*, 785-789.
- (4) P. J. Stephens, F. J. Devlin, C. F. Chabalowski, M. J. Frisch, *J. Phys. Chem.* **1994**, *98*, 11623-11627.
- (5) Gaussian 09, Revision **D.01**, M. J. Frisch, G. W. Trucks, H. B. Schlegel, G. E. Scuseria, M. A. Robb, J. R. Cheeseman, G. Scalmani, V. Barone, B. Mennucci, G. A. Petersson, H. Nakatsuji, M. Caricato, X. Li, H. P. Hratchian, A. F. Izmaylov, J. Bloino, G. Zheng, J. L. Sonnenberg, M. Hada, M. Ehara, K. Toyota, R. Fukuda, J. Hasegawa, M. Ishida, T. Nakajima, Y. Honda, O. Kitao, H. Nakai, T. Vreven, J. A. Montgomery, Jr., J. E. Peralta, F. Ogliaro, M. Bearpark, J. J. Heyd, E. Brothers, K. N. Kudin, V. N. Staroverov, R. Kobayashi, J. Normand, K. Raghavachari, A. Rendell, J. C. Burant, S. S. Iyengar, J. Tomasi, M. Cossi, N. Rega, J. M. Millam, M. Klene, J. E. Knox, J. B. Cross, V. Bakken, C. Adamo, J. Jaramillo, R. Gomperts, R. E. Stratmann, O. Yazyev, A. J. Austin, R. Cammi, C. Pomelli, J. W. Ochterski, R. L. Martin, K. Morokuma, V. G. Zakrzewski, G. A. Voth, P. Salvador, J. J. Dannenberg, S. Dapprich, A. D. Daniels, Ö. Farkas, J. B. Foresman, J. V. Ortiz, J. Cioslowski, and D. J. Fox, Gaussian, Inc., Wallingford CT, 2009.
- (6) N. Hauptmann, K. Scheil, T.G. Gopakumar, F. L. Otte, C. Schütt, R. Herges and R. Berndt, *J. Am. Chem. Soc.* **2013**, *135*, 8814-8817.
- (7) a) S. Grimme, J. Antony, S. Ehrlich and H. Krieg, *J. Chem. Phys.* **2010**, *132*, 154104; b) S. Grimme, M. Parac, *ChemPhysChem* **2003**, *4*, 292.
- (8) M. Fathalla, J. Jayawickramarajah, *Eur. J. Org. Chem.* **2009**, *35*, 6095-6099.
- (9) S. Achelle; N. Saettel, P. Baldeck, M.-P. Teulade-Fichou, P. Maillard, *J. Porph. Phthal.* **2010**, *14*, 877-894.
- (10) F. Hammerer, G. Garcia, S. Chen, F. Poyer, S. Achelle, C. Fiorini-Debuisschert, M.-P. Teulade-Fichou, P. Maillard, *J. Org. Chem.* **2014**, *79*, 1406 – 1417.



- (11) A. Ryan, A. Gehrold, R. Perusitti, M. Pintea, M. Fazekas, O. B. Locos, F. Blaikie, O. M. Senge, *Eur. J. Org. Chem.* **2011**, 29, 5817-5844.
- (12) D. R. B. Baisch, U. Jung, O. M. Magnussen, C. Nicolas, J. Lacour, J. Kubitschke, R. Herges, *J. Am. Chem. Soc.* **2009**, 131, 442-443.
- (13) J. Kubitschke, C. Näther, R. Herges, *Eur. J. Org. Chem.* **2010**, 5041-5055.
- (14) S. Kuhn, B. Baisch, U. Jung, T. Johannsen, J. Kubitschke, R. Herges, O. Magnussen, *Phys. Chem. Chem. Phys.* **2010**, 12, 4481-4487.
- (15) W. Laursen, F. C. Krebs, *Chem. Eur. J.* **2001**, 7, 1773-1783.
